# Supplementary material for: Decitabine-Mediated Upregulation of CSPG4 in Ovarian Carcinoma Cells Enables Targeting by CSPG4-Specific CAR-T Cells
Source: MDPI journal article supplement (doi:10.3390/cancers14205033), 2022-10-14
Supplement: s1 [file s1]

Fig. S3

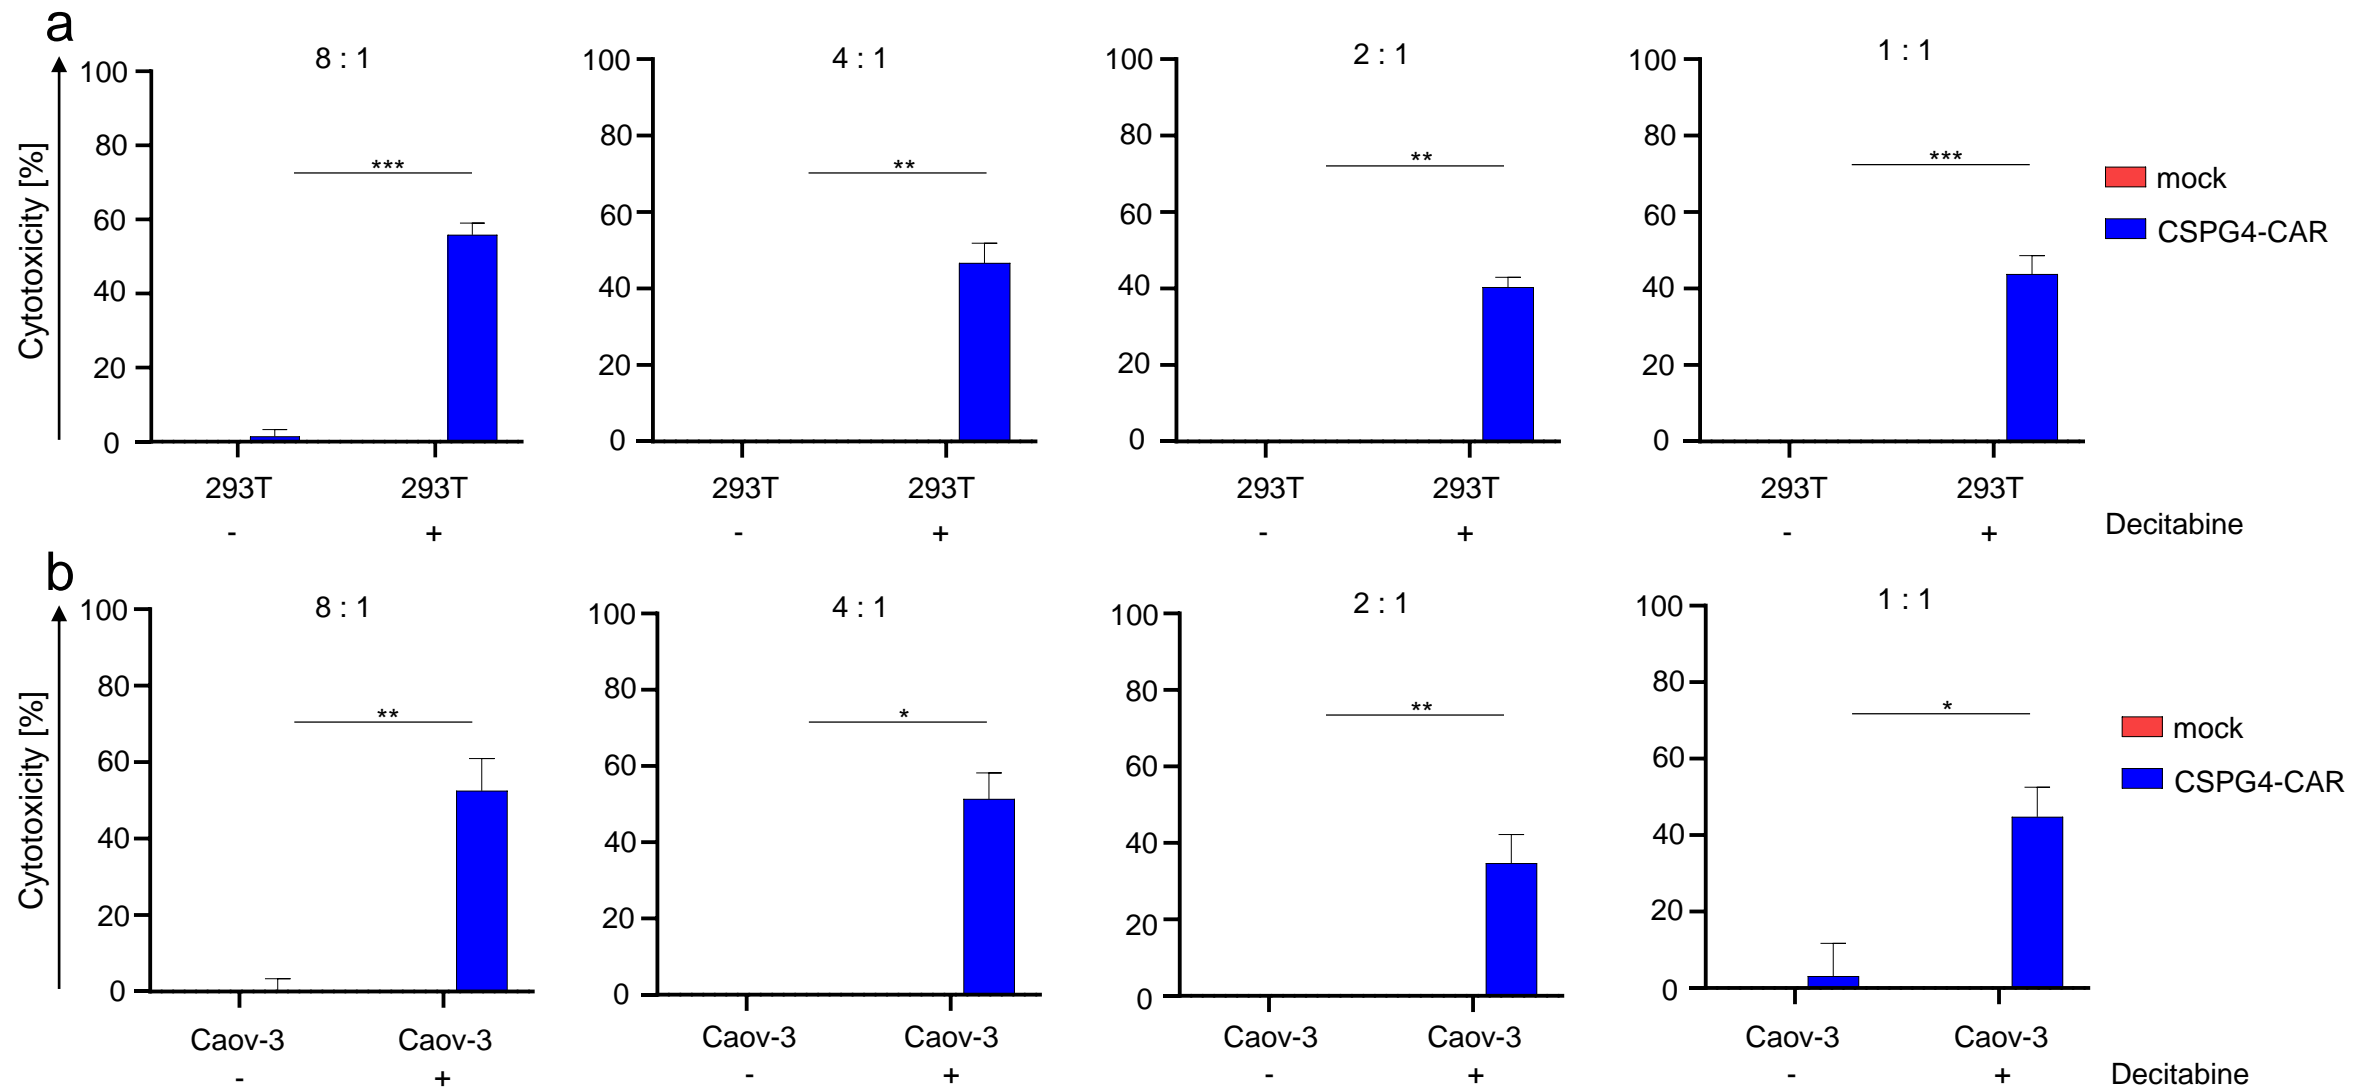

**Figure S3.** Lytic activity of CSPG4-CAR-T cells against 293T and Caov-3 cells. Cytotoxicity of CSPG4-CAR-T cells and mock T cells upon a 48h co-culture with 293T cells **(a)**, and Caov-3 cells **(b)** either treated with PBS (-) or Decitabine (+) was assessed at the indicated effector to target ratios via an XTT-based colorimetric assay. Data represent means  $\pm$  SEM of three donors, p values were calculated by Student's t test, \*\*\* indicates  $p \leq 0.001$ , \*\* indicates  $p \leq 0.01$ , and \* indicates  $p \leq 0.05$ .
